# Supplementary material for: The synthesis of mesoporous silicates containing bimetallic nanoparticles and magnetic properties of PtCo nanoparticles in silica
Source: Royal Society of Chemistry journal article supplement (doi:10.1039/b607471e), 2006-01-01
Supplement: b607471e.pdf [file b607471e.pdf]

## Supplementary Information

### The synthesis of mesoporous silicates containing bimetallic nanoparticles and magnetic properties of PtCo nanoparticles in silica

Nicola C. King, Ross A. Blackley, M. Lesley Wears, David M. Newman, Wuzong Zhou and Duncan W. Bruce

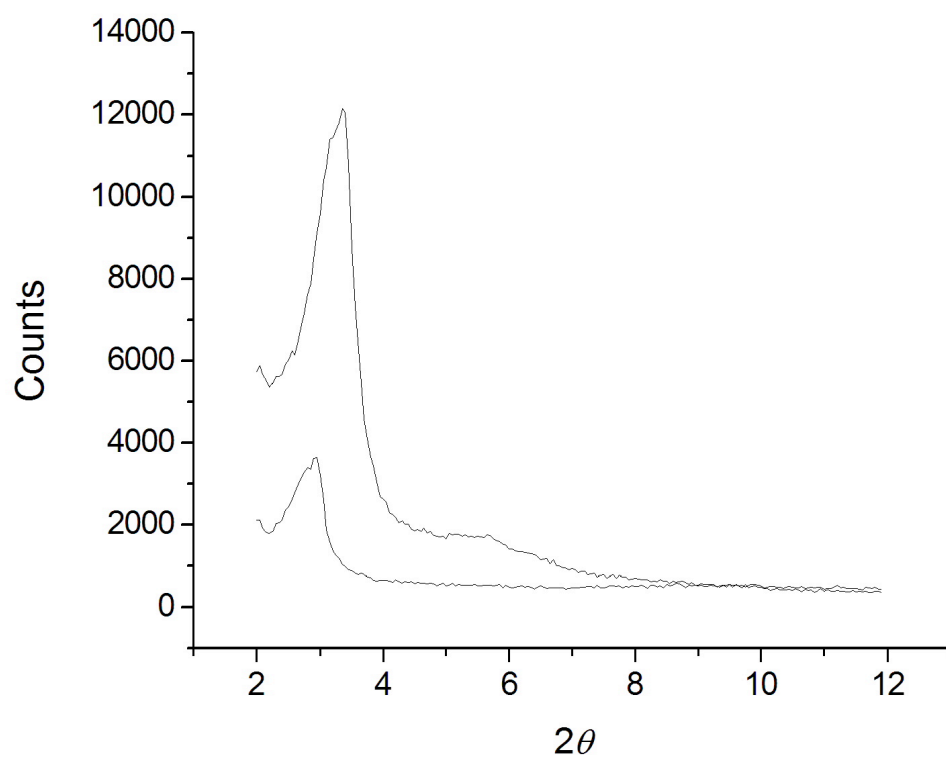

**Fig. S1** X-Ray diffraction pattern for the silicate containing PdAu nanoparticles. The upper diffraction pattern belongs to the calcined sample, while the lower pattern is from the as-synthesised material.

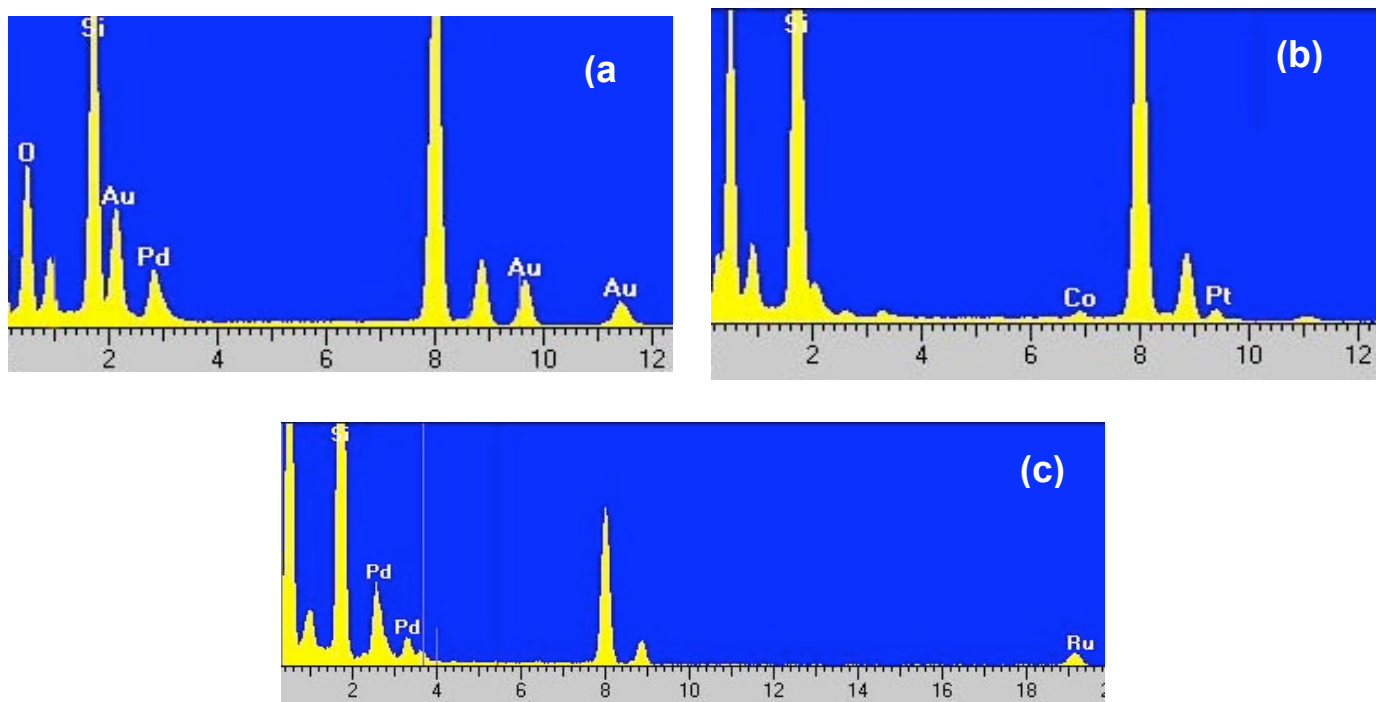

**Fig. S2** EDX spectra of the bimetallic particle containing mesoporous silicates, (a) PdAu, (b) PtCo and (c) PdRu.
